# Supplementary material for: Loss of p27kip1 increases genomic instability and induces radio-resistance in luminal breast cancer cells
Source: PubMed Central journal article supplement (PMC5429596; doi:10.1038/s41598-017-00734-3), 2017-04-04
Supplement: 41598_2017_734_MOESM1_ESM.pdf [file 41598_2017_734_MOESM1_ESM.pdf]

## **Supplementary Information**

### **Loss of p27<sup>kip1</sup> increases genomic instability and induces radioresistance in luminal breast cancer cells**

Stefania Berton, Martina Cusan, Ilenia Segatto, Francesca Citron, Sara D'Andrea, Sara Benevol, Michele Avanzo, Alessandra Dall'Acqua, Monica Schiappacassi, Robert G. Bristow, Barbara Belletti, Gustavo Baldassarre.

#### **Inventory**

Supplementary Information includes Supplementary Figures S1-S3, with legends.

## Supplementary Figures

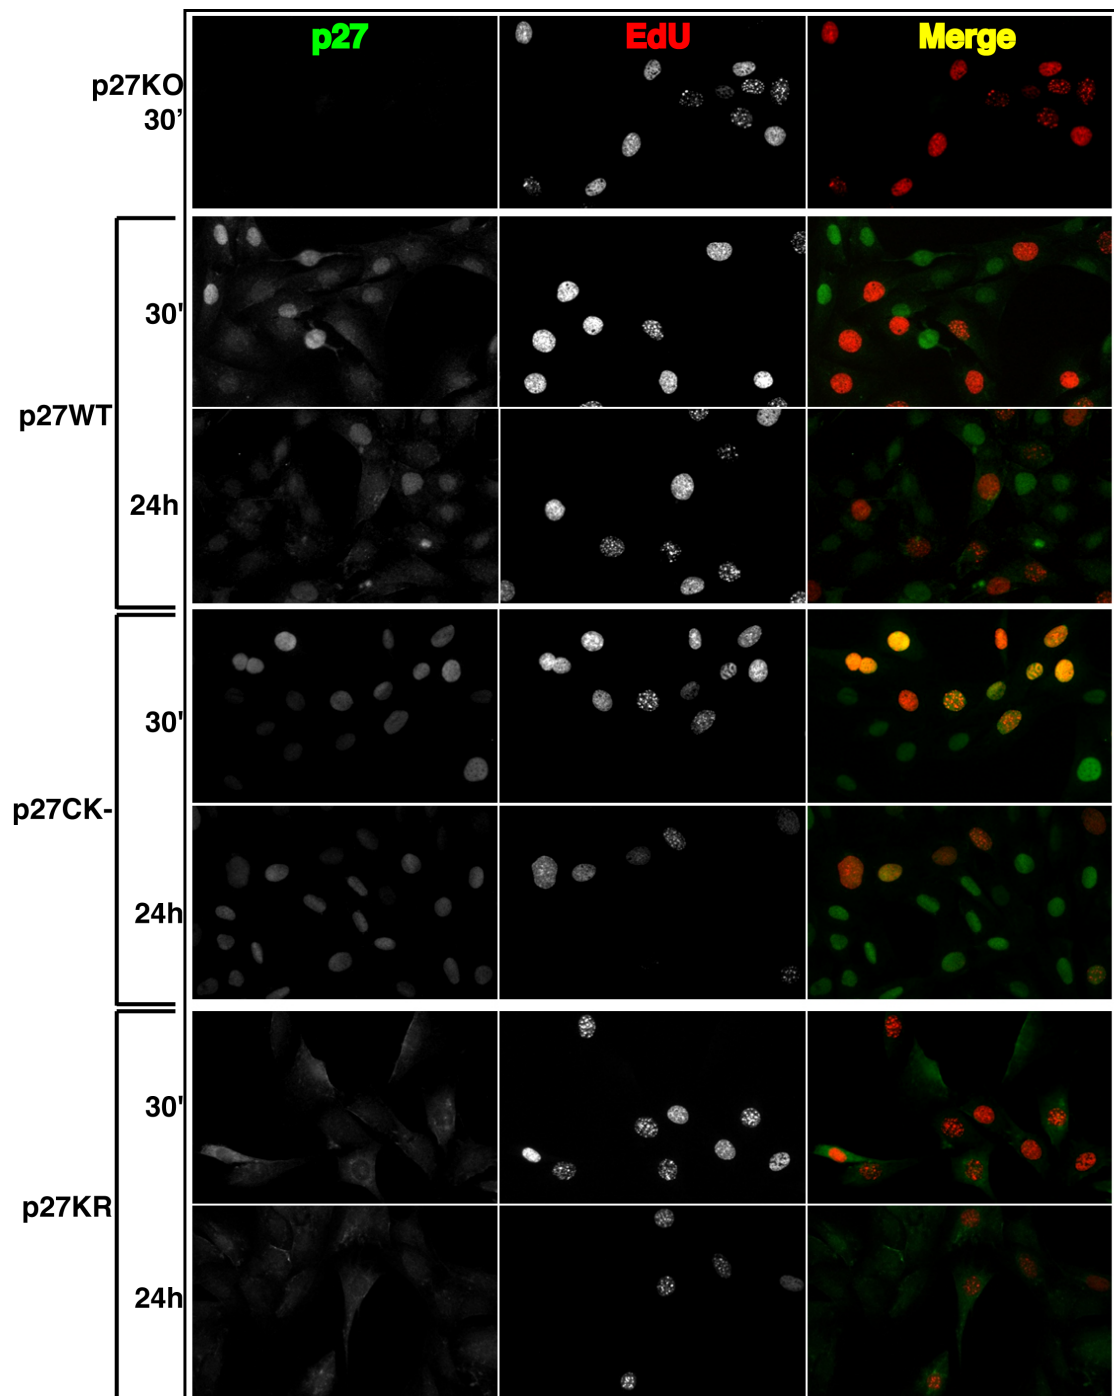

**Supplementary Fig. S1.**

**Expression and localization of p27 after IR.** p27KO fibroblasts do not express p27 and are positive for the proliferation marker 5-Edu (red). p27WT fibroblasts express p27 either in the nucleus or in the cytoplasm (green, shown in white). However, cells positive for nuclear p27 are negative for the proliferation marker 5-Edu (red, shown in white). p27CK- fibroblasts express p27 mainly in the nucleus (green, shown in

white). However, cells positive for nuclear p27 are also positive for the proliferation marker 5-EdU (yellow, in merged images). p27KR fibroblasts express p27 mainly in the cytoplasm. Cells positive for cytoplasmic p27 (green) are also positive for the proliferation marker 5-EdU in the nucleus (red). Only merged pictures on the right are shown with colors.

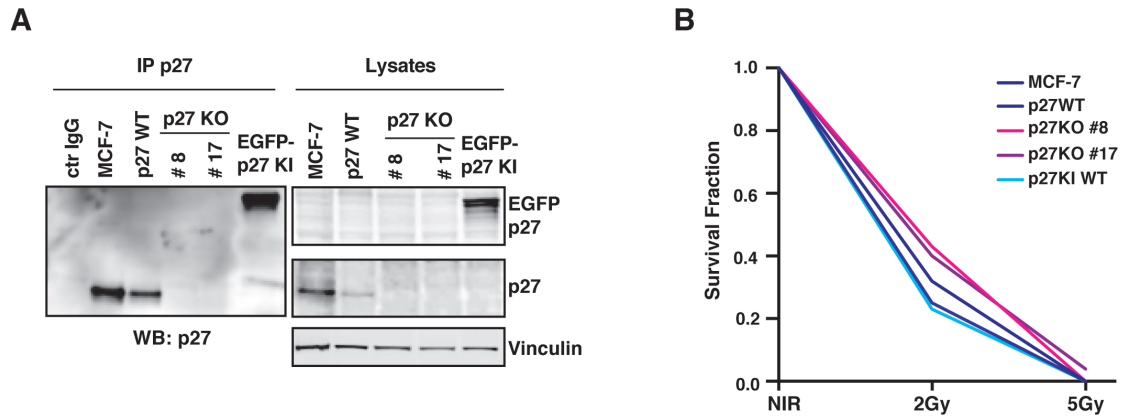

**Supplementary Fig. S2.**

**MCF-7 luminal breast cancer cells KO for p27 are more radioresistant than the parental and KI counterparts.**

**(A)** Western Blot analysis of p27 in immunoprecipitates (left panel) and in lysates (right panels), collected from the indicated cell clones and parental cell line. ctr IgG indicates a lysate immunoprecipitated with an unrelated antibody, used as a negative control. Lysates were also blotted with anti-EGFP antibody, to show the expression of the ectopic p27 in the KI clone. Vinculin was used as loading control. **(B)** Survival curve of the indicated cell clones and parental cell line irradiated with 2Gy and 5Gy and then plated in colony assay. Results are expressed as a fraction of the number of colonies counted in the non irradiated plates (NIR).

**Supplementary Fig. S3.**

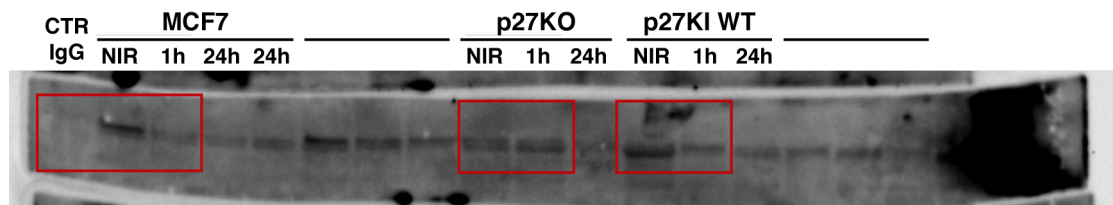

**Full length Blot of Figure 6a**

Red boxes indicate the lanes that are shown in Fig. 6a.
